# Supplementary material for: Synthesis of few-layered MoS2nanosheet-coated electrospun SnO2nanotube heterostructures for enhanced hydrogen evolution reaction
Source: Royal Society of Chemistry journal article supplement (doi:10.1039/c4nr02014f), 2014-07-15
Supplement: c4nr02014f1.pdf [file c4nr02014f1.pdf]

## Supporting Information

### **Synthesis of few-layer MoS<sub>2</sub> nanosheet-coated electrospun SnO<sub>2</sub> nanotube heterostructures for enhanced hydrogen evolution reaction**

**Yunpeng Huang <sup>a</sup>, Yue-E Miao <sup>a</sup>, Longsheng Zhang <sup>a</sup>, Weng Weei Tjiu <sup>b</sup>, Jisheng  
Pan <sup>b</sup>, Tianxi Liu <sup>a\*</sup>**

*<sup>a</sup> State Key Laboratory of Molecular Engineering of Polymers, Department of  
Macromolecular Science, Fudan University, Shanghai, 200433, P. R. China*

*<sup>b</sup> Institute of Materials Research and Engineering, A\*STAR (Agency for Science,  
Technology and Research), 3 Research Link, Singapore 117602, Singapore*

*\* To whom correspondence should be addressed. E-mail: [txliu@fudan.edu.cn](mailto:txliu@fudan.edu.cn); Tel:  
+86-21-55664197; Fax: +86-21-65640293.*

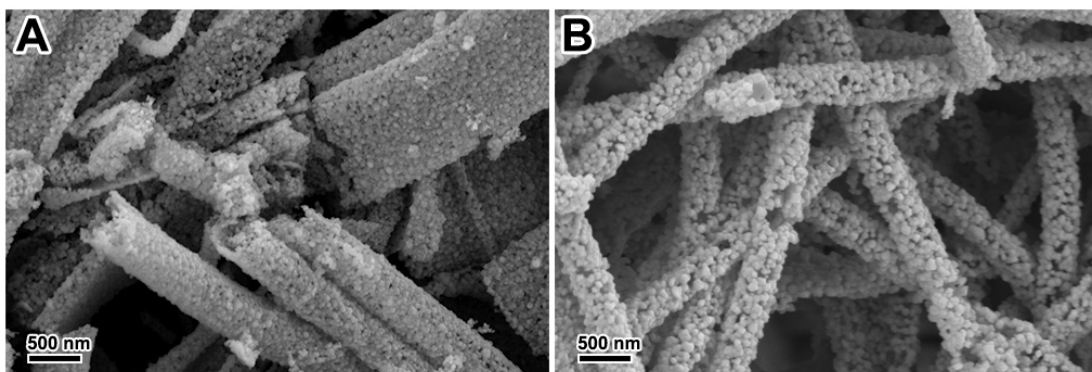

**Fig. S1** FESEM images of SnO<sub>2</sub> nanotubes synthesized from SnCl<sub>2</sub>/PVP precursors with SnCl<sub>2</sub>/PVP mass ratios of 0.3/1.2 g/g (A) and 0.7/1.2 g/g (B).

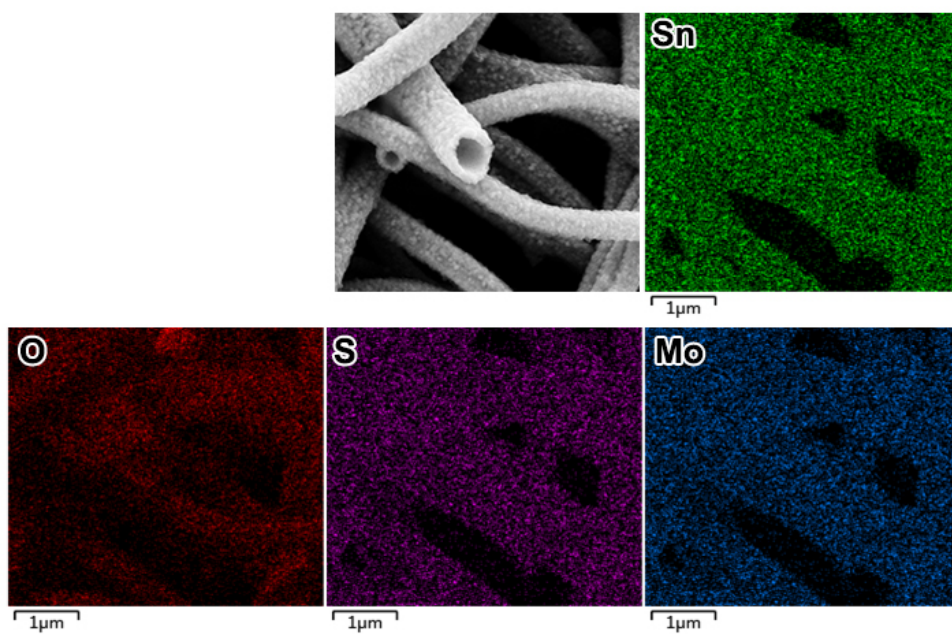

**Fig. S2** EDX mapping of MoS<sub>2</sub>/SnO<sub>2</sub>-6 hybrid nanotubes.

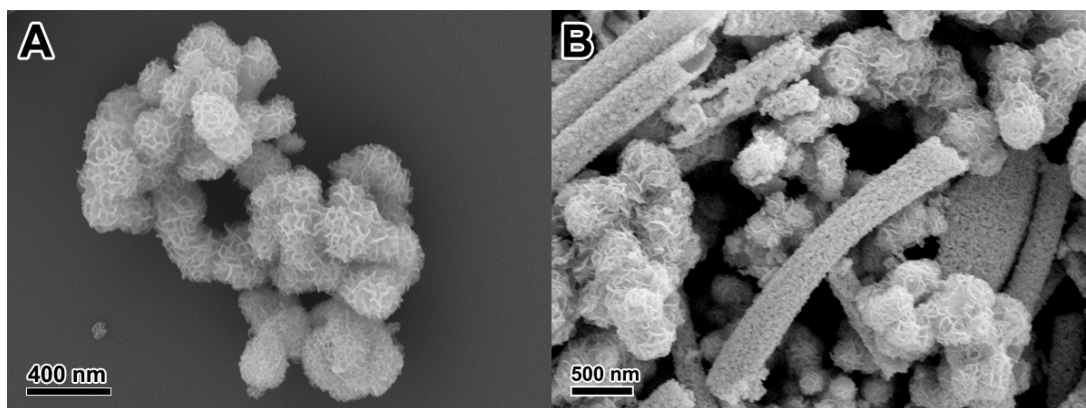

**Fig. S3** FESEM images of (A) pure MoS<sub>2</sub> nanospheres without SnO<sub>2</sub> nanotubes as growing template and (B) mixture of MoS<sub>2</sub> nanosphere and SnO<sub>2</sub> nanotubes when the solvent of DMF was replaced by H<sub>2</sub>O. Both products were prepared under the same conditions as that of MoS<sub>2</sub>/SnO<sub>2</sub> hybrid.
